# Supplementary material for: Sorting the Wheat from the Chaff: Identifying miRNAs in Genomic Survey Sequences of Triticum aestivum Chromosome 1AL
Source: PubMed Central journal article supplement (PMC3398953; doi:10.1371/journal.pone.0040859), 2012-07-17
Supplement: pone.0040859.s003.pdf [file pone.0040859.s003.pdf]

## **SUmirFind.pl & SUmirFold.pl** – Perl scripts for miRNA identification by conservation

Copyright © Stuart J. Lucas, 2012

Digital copies of the scripts and a usage guide are freely available from the author (e-mail: [slucas@sabanciuniv.edu](mailto:slucas@sabanciuniv.edu)) These scripts are written to run on Linux operating systems, but should be relatively easy to adapt for Windows. Perl, BLAST+ and UNAFold software are required to be installed on your computer to use these scripts.

---

```
#!/usr/bin/perl -w
# SUmirFind.pl - a script that uses ncbiBLAST to search for potential homologs of
known miRNAs

my ( $mirnaquery, $blastdatabase ) = @ARGV or die "Please specify a fasta file
containing the miRNA sequences you wish to search with, and the BLAST database you
wish to search, with full path if it is not in the current directory";

# Convert fasta file into a table of miRNAs

open ( MIRNAS, $mirnaquery ) or die "Could not open $mirnaquery. Is it in the
right folder?";
open ( MIRNATABLE, ">".$mirnaquery.".tbl" ) or die "Could not open an output
file!";
print MIRNATABLE "# miRNA ID\tsequence";

while($line = <MIRNAS>)
{
    chomp $line;
    if ($line =~ /^>(\S*)\s/)
    {
        print MIRNATABLE "\n$1";
        print MIRNATABLE "\t";
    }
    else
    {
        print MIRNATABLE "$line";
    }
}
print MIRNATABLE "\n";

close MIRNAS;
close MIRNATABLE;

# Populate hash table of miRNAs from newly generated table

my (%QuerymiRNAs);
open ( MIRNADATA, $mirnaquery.".tbl" ) or die "The miRNA table was not generated";
while ($line = <MIRNADATA>)
{
    chomp $line;
    if ( $line =~ /^#/ )
    {
        next;
    }
    elsif ( $line =~ /(\S*)\t(\S*)/ )
    {
        my $idkey = $1;
        my $seqval = $2;
```

```

        $QuerymiRNAs{"$sidkey"} = "$seqval";
    }
}

close MIRNADATA;

print "miRNA data analysed.... Now running BLAST for all the miRNAs. This could
take some time.\n";

# Run BLAST for the specified miRNAs

system ("blastn -task blastn-short -query $mirnaquery -db $blastdatabase -ungapped
-penalty -1 -reward 1 -outfmt 6 -out $mirnaquery.allhits" );

# Filter blast hit table (in output format 6) to remove alignments with >2
mismatches

open ( BLASTHITS, $mirnaquery.".allhits" ) or die "Couldn't find the BLAST
output!";
open ( FILTEREDHITS, ">".$mirnaquery.".results.tbl" ) or die "Results file
failure";

print FILTEREDHITS "# Query ID\tSubject
ID\t%\tlength\tmism\tgaps\tqstart\tqend\tssstart\tssend\tvalue\tbitscore\n";

my $count = 0;
while ( $line = <BLASTHITS> )
{
    chomp $line;
    my ( $qid, $sid, $percent, $allength, $mismatch, $gaps, $qstart, $qend,
    $ssstart, $ssend, $value, $bitscore ) = split /\t/, $line;
    my $qlength = length $QuerymiRNAs{ $qid };
    my $difference = $qlength - $allength;
    if ( $mismatch + $difference > 2 )
    {
        $count++;
        next;
    }
    else
    {
        print FILTEREDHITS "$line\n";
    }
}
close BLASTHITS;
close FILTEREDHITS;

print "Filtering complete. $count hits were rejected due to being too short, or
having too many mismatches.\n";

```

---

```

#!/usr/bin/perl -w
# SUMirFold.pl - a script that, using a BLAST results table, retrieves sequences
from the BLAST database and obtains their predicted secondary structure using
UNAFold, after which viable hairpins are detected and retrieved.

my $goodcount = 0;
my $badcount = 0;
my $suspectcount = 0;
my $loopno = 0;

if ( $#ARGV != 2 )
{
    print "Correct usage is:\n";
    print "perl mirnafold.pl [miRNA query file] [HitTable] [BLASTdb]\n";
}

my ( $mirnaquery, $infile, $blastdb ) = @ARGV or die "Please specify names of a
file containing known miRNAs (in fasta format), BLAST hit table (generated using
'-outfmt 6' when running BLAST) and blast database from which the hit table was
generated.\n";

# Convert fasta file into a table of miRNAs

open ( MIRNAS, $mirnaquery ) or die "Could not open $mirnaquery. Is it in the
right folder?";
open ( MIRNATABLE, ">".$mirnaquery.".tbl" ) or die "Could not open an output
file!";

print MIRNATABLE "# miRNA ID\tsequence";

while ( $line = <MIRNAS> )
{
    chomp $line;
    if ( $line =~ /^>(\S*)\s/ )
    {
        print MIRNATABLE "\n$1";
        print MIRNATABLE "\t";
    }
    else
    {
        print MIRNATABLE "$line";
    }
}
print MIRNATABLE "\n";

close MIRNAS;
close MIRNATABLE;

# Populate hash table of miRNAs from newly generated table

my (%QuerymiRNAs);
open ( MIRNADATA, $mirnaquery.".tbl" ) or die "The miRNA table was not generated";
while ( $line = <MIRNADATA> )
{
    chomp $line;
    if ( $line =~ /^#/ )
    {
        next;
    }
    elsif ( $line =~ /(\S*)\t(\S*)/ )

```

```

        {
            my $idkey = $1;
            my $seqval = $2;
            $QuerymiRNAs{"$idkey"} = "$seqval";
        }
    }
close MIRNADATA;
print "miRNA data analysed.  Preparing to fold RNA sequences.\n";

unless ( -e $infile && -f $infile && -r $infile )
{
    die "$infile cannot be accessed.  Does it exist?\n";
}

open ( IN, $infile ) or die "I don't have permission to open $infile!\n";
open ( OUT, ">".$infile.".seqtable" ) or die "Can't open an output file!\n";
open ( OUTTABLE, ">".$infile.".tbl" ) or die "Can't open an output file!\n";
open ( DISCARD, ">".$infile.".rejects" ) or die "Can't open an output file!\n";
open ( SUSPECT, ">".$infile.".suspect.tbl" ) or die "Can't open an output
file!\n";
open ( SUSPECTOUT, ">".$infile.".suspect.seqtable" ) or die "Can't open an output
file!\n";
open ( LOGFILE, ">".$infile.".log" ) or die "Can't open an output file!\n";
print DISCARD "Matches rejected:\n";
print DISCARD "Seq ID\tmiRNA\tStart\tEnd\tReason for rejection\n";
print OUTTABLE "#Structure      \tMatched      \tConserved\tMatch\tMature
miRNA\tComplement\n";
print OUTTABLE "#Filename      \tSequence ID\tmiRNA
\tlength\tstart\tend\tstart\tend\n";
print SUSPECT "#Structure      \tMatched      \tConserved\tMatch\tMature
miRNA\tComplement\n";
print SUSPECT "#Filename      \tSequence ID\tmiRNA
\tlength\tstart\tend\tstart\tend\n";
system ( "mkdir $infile.initialfolds" );
system ( "mkdir $infile.hairpins" );

while ($line = <IN>)
{
    chomp $line;
    next if $line =~ /^#/;
    next if $line eq "";
    print ".$line";

# Get the values from the table, retrieve the sequence from the BLAST database and
write it to a fasta file

    my ( $qid, $sid, $percent, $allength, $mismatch, $gaps, $qstart, $qend,
$sstart, $send, $evalue, $bitscore ) = split /\t/, $line;
    my $qlength = length $QuerymiRNAs{ $qid };
    $loopno++;
    my $uniqueid = $loopno."_".$sid;
    system ("blastdbcmd -db $blastdb -entry $sid -outfmt %f -out
$uniqueid.fsa" );
    print LOGFILE "Testing hit for $qid on sequence $uniqueid\n";

# Reverse complement the sequence if it is on the negative strand; otherwise just
convert Ts to Us
    if ( $sstart > $send )
    {
        print LOGFILE "This hit is on the negative strand.  Initiating
reverse complement.\n";
    }
}

```

```

my $tempseq = "";
my $defline = "";
open ( NEGSTRAND, $uniqueid.".fsa" );
while ( $line = <NEGSTRAND> )
{
    chomp $line;
    if ( $line =~ m/^>/)
    {
        $defline = $line;
    }
    else
    {
        $tempseq = $tempseq.$line;
    }
}
close NEGSTRAND;
$tempseq = scalar reverse ("$tempseq");
$tempseq =~ tr/[UT]/a/;
$tempseq =~ tr/A/u/;
$tempseq =~ tr/C/g/;
$tempseq =~ tr/G/c/;
$tempseq =~ tr/acgu/ACGU/;
open ( POSSTRAND, ">".$uniqueid.".fsa" );
print POSSTRAND "$defline\n$tempseq\n";
close POSSTRAND;
$seqlength = length ($tempseq);
$sstart = 1 + $seqlength - $sstart;
$send = 1 + $seqlength - $send;
print LOGFILE "Reverse complement stats (id, length, hit start and
end): $sid, $seqlength, $sstart, $send\n";
}
else
{
    my $tempseq = "";
    my $defline = "";
    open ( DNASTRAND, $uniqueid.".fsa" );
    while ( $line = <DNASTRAND> )
    {
        chomp $line;
        if ( $line =~ m/^>/)
        {
            $defline = $line;
        }
        else
        {
            $tempseq = $tempseq.$line;
        }
    }
    close DNASTRAND;
    $tempseq =~ tr/T/U/;
    open ( RNASTRAND, ">".$uniqueid.".fsa" );
    print RNASTRAND "$defline\n$tempseq\n";
    close RNASTRAND;
}

# Adjust ends of putative mature miRNA if it is shorter than query miRNA, and note
'extended' miRNA duplex end
    $sstart = $sstart - $qstart + 1;
    $send = $send + $qlength - $qend;
    my $exstart = $sstart - 2;

```

```

# Run UNAFold on the fasta file
print LOGFILE "Running UNAFold on $sid\n";
system ("perl /usr/bin/UNAFold.pl -X 1 --ann ss-count $uniqueid.fsa");

# Examine the Ct file for unpaired bases in the miRNA sequence
open ( FOLD, $uniqueid.".fsa.ct" ) or die "where is the ct file?";
my $linecount = 0;
my $sssflag = 0;
my $revstart = 0;
my $revstartbackup = 0;
my $revend = 0;
my $revendbackup = 0;
my $revlength = 0;
while ($line = <FOLD>)
{
    chomp $line;
    next if $line =~ /dG/;
    $linecount++;
    next if $linecount < ($exstart);
    next if $linecount > ($send);
    if ( $line =~ /\d*\t\w\t\d*\t\d*\t(\d*)\t\d*\t\d*\t\d*/ )
    {
        $sssflag++ unless $1 > 0;
        if ( $linecount == $exstart )
        {
            $revend = $1;
        }
        if ( $linecount == $sstart )
        {
            $revendbackup = $1;
        }
        if ( $linecount == $send - 2 )
        {
            $revstart = $1;
        }
        if ( $linecount == $send )
        {
            $revstartbackup = $1;
        }
    }
}
close FOLD;
if ( $revend == 0 )
{
    $revend = $revendbackup - 2;
}
if ( $revstart == 0 )
{
    $revstart = $revstartbackup - 2;
}
$revlength = $revend - $revstart + 1;
if ( $sssflag > 4 )
{
    print LOGFILE "Too many unpaired bases in the miRNA region of $sid.
Files deleted.\n";
    print DISCARD "$sid\t$qid\t$sstart\t$send\t$sssflag unpaired bases
in miRNA\n";
    system ("rm $uniqueid.*");
    $badcount++;
}
}
elsif ( $revend == -2 or $revstart == -2)

```

```

    {
        print LOGFILE "One end of the miRNA region was not base-paired, so
could not locate the end of the miRNA complementary sequence. This hit will be
placed in the 'suspect' table.\n";
        if ( $revend == -2 )
        {
            $revend = $revstart + $qlength - 1;
        }
        elsif ( $revstart == -2 )
        {
            $revstart = $revend - $qlength + 1;
        }
        print SUSPECT
"$uniqueid\t$ssid\t$qid\t$qlength\t$ssstart\t$ssend\t$revstart\t$revend\n";
        open ( FASTA, $uniqueid.".fsa");
        while ($line = <FASTA>)
        {
            chomp $line;
            if ( $line =~ />/ )
            {
                print SUSPECTOUT "$uniqueid\t";
            }
            else
            {
                print SUSPECTOUT "$line";
            }
        }
        print SUSPECTOUT "\n";
        close FASTA;
        system ("rm $uniqueid.fsa.*");
        system ("rm $uniqueid.fsa_1.ss");
        system ("rm $uniqueid.fsa_1.pdf");
        system ("mv $uniqueid.fsa $infile.initialfolds");
        $suspectcount++;
    }
    elsif ( $revlength - $qlength > 3 )
    {
        print LOGFILE "The miRNA complementary sequence of $ssid contains
breaks or a large loop. Files deleted.\n";
        print DISCARD "$ssid\t$qid\t$ssstart\t$ssend\tmiRNA complementary
sequence is broken \n";
        system ("rm $uniqueid.*");
        $badcount++;
    }
    elsif ( $ssflag == 0 )
    {
        print LOGFILE "The putative miRNA sequence of $ssid is perfectly
base-paired, so it is more likely to be an inverted repeat or siRNA. This hit
will be placed in the 'suspect' table.\n";
        print SUSPECT
"$uniqueid\t$ssid\t$qid\t$qlength\t$ssstart\t$ssend\t$revstart\t$revend\n";
        open ( FASTA, $uniqueid.".fsa");
        while ($line = <FASTA>)
        {
            chomp $line;
            if ( $line =~ />/ )
            {
                print SUSPECTOUT "$uniqueid\t";
            }
            else
            {

```

```

        print SUSPECTOUT "$line";
    }
}
print SUSPECTOUT "\n";
close FASTA;
system ("rm $uniqueid.fsa.*");
system ("rm $uniqueid.fsa_1.ss");
system ("rm $uniqueid.fsa_1.pdf");
system ("mv $uniqueid.fsa $infile.initialfolds");
$suspectcount++;
}
else
{
    print LOGFILE "The secondary structure of $uniqueid passes initial
analysis, writing to output table and fasta file.\n";
    print OUTTABLE
"$uniqueid\t$ssid\t$qid\t$qlength\t$sstart\t$send\t$revstart\t$revend\n";
    open ( FASTA, $uniqueid.".fasta");
    while ($line = <FASTA>)
    {
        chomp $line;
        if ( $line =~ /^>/ )
        {
            print OUT "$uniqueid\t";
        }
        else
        {
            print OUT "$line";
        }
    }
    print OUT "\n";
    close FASTA;
    system ("rm $uniqueid.fsa.*");
    system ("rm $uniqueid.fsa_1.ss");
    system ("rm $uniqueid.fsa_1.pdf");
    system ("mv $uniqueid.fsa $infile.initialfolds");
    $goodcount++;
}
}
close IN;
close OUT;
close OUTTABLE;
close SUSPECT;
close SUSPECTOUT;

# Shunt RNA secondary structures into a folder

system ("mv *.fsa_1.* $infile.initialfolds");

print LOGFILE "From the input table, $goodcount sequence(s) gave folds that could
contain a miRNA.\n$badcount sequence(s) were rejected after
folding.\n$suspectcount sequence(s) are more likely to be repeats or siRNAs.\n\n";
close LOGFILE;

# Conduct further analysis on hairpin regions of all good hits

open ( GOODTABLE, $infile.".tbl" );
open ( RESULTS, ">".$infile.".hairpins.tbl" ) or die "Can't open an output
file!\n";
open ( HAIRPINS, ">".$infile.".hairpins.fsa" ) or die "Can't open an output
file!\n";

```



```

open ( LOGFILE2, ">".$infile.".hairpins.log" ) or die "Can't open an output
file!\n";
print RESULTS "Unique\tNew miRNA\t\t\tConserved
miRNA\t\t\tSequence\tMature\tMature\tHairpin\tPre-miRNA stats\n";
print RESULTS "Hit
ID\tID\tSequence\tLength\tID\tSequence\tMismatch\tID\tStart\tEnd\tlocation\tlength
\tMFE\tGC%\tMFEI\tstart\ttsequence\n";
my $goodhairpins = 0;

while ( $line = <GOODTABLE> )
{
    chomp $line;
    next if $line =~ /^#/;
    my ( $uniqueid, $sseqid, $mirnaid, $length, $sstart, $send, $revstart,
$revend ) = split /\t/, $line;
    my ( $armflag, $seq ) = "";
    my ( $hairpinstart, $hairpinend, $hairpinlength ) = 0;
    print LOGFILE2 "Analysing hit $uniqueid for $mirnaid\n";

# Determine which part of the sequence corresponds to putative hairpin and
retrieve it from the sequence table
    if ( $sstart > $revstart )
    {
        $armflag = "3'";
        $hairpinstart = $revstart - 20;
        $hairpinend = $send + 20;
    }
    elsif ( $sstart < $revstart )
    {
        $armflag = "5'";
        $hairpinstart = $sstart - 20;
        $hairpinend = $revend + 20;
    }
    else
    {
        print LOGFILE2 "The miRNA co-ordinates for $uniqueid don't make
sense! Skipping it.\n";
        next;
    }

    open ( GOODSEQS, $infile.".seqtable" );
    while ( $line = <GOODSEQS> )
    {
        my ( $fseqid, $fseq ) = split /\t/, $line;
        if ( $fseqid =~ m/$uniqueid/ )
        {
            $seq = $fseq;
            last;
        }
    }
    close GOODSEQS;
    if ( $hairpinend - $hairpinstart < (2*$length) + 40 )
    {
        print LOGFILE2 "The miRNA region of $sseqid goes round the head of
the hairpin; discarded.\n";
        print DISCARD "$sseqid\t$mirnaid\t$sstart\t$send\tmiRNA goes round
head of hairpin\n";
        next;
    }
    if ( $hairpinstart < 1 )
    {

```

```

        $hairpinstart = 1;
    }
    if ( $hairpinend > length $seq )
    {
        $hairpinend = length $seq;
    }
    $hairpinlength = $hairpinend - $hairpinstart + 1;

    my $hairpinseq = substr $seq, ($hairpinstart-1), $hairpinlength;
    my $matseq = substr $seq, ($sstart-1), $length;
    my $matstart = $sstart - $hairpinstart;
    my $matend = $send - $hairpinstart;
    print LOGFILE2 "Hairpin stats (start, end, length):\n";
    print LOGFILE2 "$hairpinstart\t$hairpinend\t$hairpinlength\n";
    print LOGFILE2 "Running UNAFold.pl on the hairpin sequence... ";
    open ( PFASTA, ">".$uniqueid.".hairpin.fsa" ) or die "Can't open an output
file!\n";
    print PFASTA ">$sseqid\t$mirnaid\n";
    print PFASTA "$hairpinseq\n";
    close PFASTA;

# Run UNAFold on the hairpin, get useful information from the .ct file

    system ("perl /usr/bin/UNAFold.pl -X 1 --ann ss-count
$uniqueid.hairpin.fsa");
    open ( HAIRPINFOLD, $uniqueid.".hairpin.fsa.ct" ) or die "where is the ct
file?";
    my $GCcount = 0;
    while ( $line = <HAIRPINFOLD> )
    {
        chomp $line;
        if ( $line =~ m/dG =\s(\S+)/ )
        {
            $mfe = $1;
        }
        elsif ( $line =~ /\d*\t(\w)\t\d*\t\d*\t\d*\t\d*\t\d*\t\d*/ )
        {
            $GCcount++ if $1 =~ /(G|C)/;
        }
    }
    close HAIRPINFOLD;

# Process data and print results files

    my $mirnafam = substr ($mirnaid, 3);
    my $conseq = $QuerymiRNAs{"$mirnaid"};
    my $GCcomp = 100*$GCcount/$hairpinlength;
    my $amfe = (0-100*$mfe/$hairpinlength);
    my $mfei = $amfe/$GCcomp;
    my $mism = 0;
    for ($loopcount = 0; $loopcount < $length; $loopcount++)
    {
        $mism++ if substr ($conseq, $loopcount, 1) ne substr ($matseq,
$loopcount, 1);
    }
    if ( $GCcomp < 24 or $GCcomp > 71 )
    {
        print LOGFILE2 "The hairpin for $uniqueid has too low or high GC
content. Deleting files.\n";
        print DISCARD "$sseqid\t$mirnaid\t$sstart\t$send\tGC content
outside acceptable range\n";
    }

```

```

        system ("rm $uniqueid.*");
    }
    elsif ( $mfei < 0.67 )
    {
        print LOGFILE2 "The hairpin for $uniqueid has MFEI < 0.67.
Deleting files.\n";
        print DISCARD "$sseqid\t$mirnaid\t$sstart\t$send\tMFEI outside
acceptable range\n";
        system ("rm $uniqueid.*");
    }
    else
    {
        print LOGFILE2 "The hairpin passes analysis, printing to results
table\n";
        print RESULTS
"$uniqueid\ttae$mirnafam\t$matseq\t$length\t$mirnaid\t$conseq\t$mism\t$sseqid\t$ma
tstart\t$matend\t$armflag\t$hairpinlength\t$mfe\t$GCcomp\t$mfei\t$hairpinstart\t$h
airpinseq\n";
        print HAIRPINS ">$sseqid\t$mirnaid\n$hairpinseq\n";
        system ("rm $uniqueid.hairpin.fsa.*");
        system ("rm $uniqueid.hairpin.fsa_1.ss");
        system ("rm $uniqueid.hairpin.fsa_1.pdf");
        system ("mv $uniqueid.hairpin.fsa $infile.hairpins");
        $goodhairpins++
    }
}
close RESULTS;
close HAIRPINS;
close GOODTABLE;

# Carry out the same hairpin analysis on suspect hits
print LOGFILE2 "Moving on to examine suspect hits from initial folding
analysis...\n";
open ( SUSPECTTABLE, $infile.".suspect.tbl" );
open ( SUSPECTRESULTS, ">".$infile.".suspecthairpins.tbl" ) or die "Can't open an
output file!\n";
open ( SUSPECTHAIRPINS, ">".$infile.".suspecthairpins.fsa" ) or die "Can't open an
output file!\n";
print SUSPECTRESULTS "Unique\tNew miRNA\t\t\tConserved
miRNA\t\t\tSequence\tMature\tMature\tHairpin\tPre-miRNA stats\n";
print SUSPECTRESULTS "Hit
ID\tID\tSequence\tLength\tID\tSequence\tMismatch\tID\tStart\tEnd\tlocation\tlength
\tMFE\tGC%\tMFEI\tstart\tsequence\n";
my $suspecthairpins = 0;

while ( $line = <SUSPECTTABLE> )
{
    chomp $line;
    next if $line =~ /^#/;
    my ( $uniqueid, $sseqid, $mirnaid, $length, $sstart, $send, $revstart,
$revend ) = split /\t/, $line;
    my ( $armflag, $seq ) = "";
    my ( $hairpinstart, $hairpinend, $hairpinlength ) = 0;
    print LOGFILE2 "Analysing hit $uniqueid\n";

# Determine which part of the sequence corresponds to putative hairpin and
retrieve it from the sequence table
    if ( $sstart > $revstart )
    {
        $armflag = "3'";
        $hairpinstart = $revstart - 20;
    }
}

```

```

        $hairpinend = $send + 20;
    }
    elsif ( $sstart < $revstart )
    {
        $armflag = "5'";
        $hairpinstart = $sstart - 20;
        $hairpinend = $revend + 20;
    }
    else
    {
        print LOGFILE2 "The miRNA co-ordinates for $uniqueid don't make
sense! Skipping it.\n";
        next;
    }

    open ( SUSPECTSEQS, $infile.".suspect.seqtable" );
    while ( $line = <SUSPECTSEQS> )
    {
        my ( $fseqid, $fseq) = split /\t/, $line;
        if ( $fseqid =~ m/$uniqueid/ )
        {
            $seq = $fseq;
            last;
        }
    }
    close SUSPECTSEQS;
    if ( $hairpinend - $hairpinstart < (2*$length) + 40 )
    {
        print LOGFILE2 "The miRNA region of $sseqid goes round the head of
the hairpin; discarded.\n";
        print DISCARD "$sseqid\t$mirnaid\t$sstart\t$send\tmiRNA goes round
head of hairpin\n";
        next;
    }
    if ( $hairpinstart < 1 )
    {
        $hairpinstart = 1;
    }
    if ( $hairpinend > length $seq )
    {
        $hairpinend = length $seq;
    }
    $hairpinlength = $hairpinend - $hairpinstart + 1;

    my $hairpinseq = substr $seq, ($hairpinstart-1), $hairpinlength;
    my $matseq = substr $seq, ($sstart-1), $length;
    my $matstart = $sstart - $hairpinstart;
    my $matend = $send - $hairpinstart;
    print LOGFILE2 "Hairpin stats (start, end, length):\n";
    print LOGFILE2 "$hairpinstart\t$hairpinend\t$hairpinlength\n";
    print LOGFILE2 "Running UNAFold.pl on the hairpin sequence... ";
    open ( PFASTA, ">".$uniqueid.".hairpin.fsa" ) or die "Can't open an output
file!\n";
    print PFASTA ">$sseqid\t$mirnaid\n";
    print PFASTA "$hairpinseq\n";
    close PFASTA;

# Run UNAFold on the hairpin, get useful information from the .ct file

    system ("perl /usr/bin/UNAFold.pl -X 1 --ann ss-count
$uniqueid.hairpin.fsa");

```

```

open ( HAIRPINFOLD, $uniqueid.".hairpin.fsa.ct" ) or die "where is the ct
file?";
my $GCcount = 0;
while ( $line = <HAIRPINFOLD> )
{
    chomp $line;
    if ( $line =~ m/dG =\s(\S+)/ )
    {
        $mfe = $1;
    }
    elsif ( $line =~ /\d*\t(\w)\t\d*\t\d*\t\d*\t\d*\t\d*\t\d*/ )
    {
        $GCcount++ if $1 =~ /(G|C)/;
    }
}
close HAIRPINFOLD;

# Process data and print results files

my $mirnafam = substr ($mirnaid, 3);
my $conseq = $QuerymiRNAs{"$mirnaid"};
my $GCcomp = 100*$GCcount/$hairpinlength;
my $amfe = (0-100*$mfe/$hairpinlength);
my $mfei = $amfe/$GCcomp;
my $mism = 0;
for ($loopcount = 0; $loopcount < $length; $loopcount++)
{
    $mism++ if substr ($conseq, $loopcount, 1) ne substr ($matseq,
$loopcount, 1);
}
if ( $GCcomp < 24 or $GCcomp > 71 )
{
    print LOGFILE2 "The hairpin for $uniqueid has too low or high GC
content. Deleting files.\n";
    print DISCARD "$sseqid\t$mirnaid\t$sstart\t$send\tGC content
outside acceptable range\n";
    system ("rm $uniqueid.*");
}
elsif ( $mfei < 0.67 )
{
    print LOGFILE2 "The hairpin for $uniqueid has MFEI < 0.67.
Deleting files.\n";
    print DISCARD "$sseqid\t$mirnaid\t$sstart\t$send\tMFEI outside
acceptable range\n";
    system ("rm $uniqueid.*");
}
else
{
    print LOGFILE2 "The hairpin passes analysis, printing to suspect
results table\n";
    print SUSPECTRESULTS
"$uniqueid\ttae$mirnafam\t$matseq\t$length\t$mirnaid\t$conseq\t$mism\t$sseqid\t$ma
tstart\t$matend\t$sarmflag\t$hairpinlength\t$mfe\t$GCcomp\t$mfei\t$hairpinstart\t$h
airpinseq\n";
    print SUSPECTHAIRPINS ">$sseqid\t$mirnaid\n$hairpinseq\n";
    system ("rm $uniqueid.hairpin.fsa.*");
    system ("rm $uniqueid.hairpin.fsa_1.ss");
    system ("rm $uniqueid.hairpin.fsa_1.pdf");
    system ("mv $uniqueid.hairpin.fsa $infile.hairpins");
    $suspecthairpins++
}
}

```

```
}

print LOGFILE2 "\nFrom $goodcount viable folds, $goodhairpins passed the hairpin
statistics criteria.\n";
print LOGFILE2 "From $suspectcount suspect but possible folds, $suspecthairpins
passed the hairpin statistics criteria.\n";
system ("mv *.fsa_1.* $infile.hairpins");
close SUSPECTTABLE;
close SUSPECTHAIRPINS;
close SUSPECTRESULTS;
close DISCARD;
close LOGFILE2;
```

---

These scripts are free software: you can redistribute it and/or modify them under the terms of the GNU General Public License as published by the Free Software Foundation, version 3 of the License.

These scripts are distributed in the hope that they will be useful, but WITHOUT ANY WARRANTY; without even the implied warranty of MERCHANTABILITY or FITNESS FOR A PARTICULAR PURPOSE. See the GNU General Public License for more details: <http://www.gnu.org/licenses/>
