# Supplementary material for: Sorting the Wheat from the Chaff: Identifying miRNAs in Genomic Survey Sequences of Triticum aestivum Chromosome 1AL
Source: PLoS One. 2012 Jul 17;7(7):e40859. doi: 10.1371/journal.pone.0040859 (PMC3398953; doi:10.1371/journal.pone.0040859)
Supplement: Table S2 — Candidate novel miRNA coding sequences from chromosome 1AL. Details of miRPara-predicted hairpins that showed no similarity to known miRNAs, proteins, repeats or other RNA species, but for which there is evidence of expression. (XLS) [file pone.0040859.s002.xls]

## Sheet: miRPara candidate best hits
	Hairpin sequence	Start	Putative miRNA ID code	Mature miRNA sequence	Start in hairpin	Location	SVM probability score
Candidate1	agcucccucugugccgagucggugacggacugccagucggacugcuccgacucaugggcaucGGCUCUCAUCACCGAGCUCGaccaguacaagaccgagaca	148	F003IAL01B5K1X_148_63_20	GGCUCUCAUCACCGAGCUCG	63	3	0.979627
Candidate2	cuguagguaauggaagccugaccugcaguaugcaagcaaguggggaugguucagaguuccaugauaacuccaguuucaguaaaCUAGCAGGUAUGGUUUGCAUgacug	71	F003IAL01BY8CN_71_84_20	CUAGCAGGUAUGGUUUGCAU	84	3	1.08537
Candidate3	ugaggagaagaagaggaggagcucaacgcugcagcagagaaauaacacuagaguaucgccuuagauccagccUUUGGUGAUAGCGUUGUUUCUagauuuucuucucuguu	115	F003IAL01C059I_115_73_21	UUUGGUGAUAGCGUUGUUUCU	73	3	0.813183
Candidate4	aguuucagaaauuguuucuuguacucauuguuauugugucuuguaaaggauuacuggcuacauuggauucuucuccccacaugaguuUGGGUGCAAUCAAUAAAUUUC	124	F003IAL01CC36R_124_88_21	UGGGUGCAAUCAAUAAAUUUC	88	3	0.818308
Candidate5	agcgcgcuccgacggGCCUCCCACGCGCGGGCGAGuggcgucaugugggcgacgcgguggucucuccgguguggaggugugcgaugaggugcguac	223	F003IAL01CPLYN_223_16_20	GCCUCCCACGCGCGGGCGAG	16	5	0.815299
Candidate6	auaaucucauaauggaagcacaggucaauuguugagucagacacgcaaucugaauaacugaaugcuccugcUGCUCCAACAGUGGAACUUGucuguaugagaac	238	F003IAL01CRQAS_238_72_20	UGCUCCAACAGUGGAACUUG	72	3	0.909297
Candidate7	ucaguagagGGAGACGUUUCAAUGACCUAggaggagucagaagcgguagagugucuccacuguacuaguaguaauuguuuuucuggguagcuguagagugucuccacuguacu	380	F003IAL01DV7IQ_380_10_20	GGAGACGUUUCAAUGACCUA	10	5	0.929692
Candidate8	agcuacaaacaccuaugcuuggugccgccugaugcugcugucuugccuugacuugccuccguaGGCGGCGCCAGCUGCGUCUGGUgccuccac	197	F0RUNSI01AFOZQ_197_64_22	GGCGGCGCCAGCUGCGUCUGGU	64	3	1.06302
Candidate9	guugagauucauaUGGCUGAGACAUAAUUUUAAcugggcgccuucagauguaaucuauugccucugacaugugauuugcuacaaaauuaugucucaacuaucuauauuuuuacau	153	F0RUNSI01AW4SK_153_14_20	UGGCUGAGACAUAAUUUUAA	14	5	1.42907
Candidate10	auaagaaaaguCAUAGUGGAACUACAUCUGUUCUGucggugguggcaguauuuagaugcaucacucaccuaggcagauguagacguacuauguguaucuuuucuu	1	F0RUNSI01AXY6B_1_12_24	CAUAGUGGAACUACAUCUGUUCUG	12	5	0.978946
Candidate11	cccgcuucuccucguggucccgugucuucccggcgcgccgaucuguacggcaGGAUGGCUCGGGACCUUGAUGAgcgcgg	16	F0RUNSI01CLHEH_16_53_22	GGAUGGCUCGGGACCUUGAUGA	53	3	1.03118
Candidate12	gagacaggugccauuauagGAAGUUUUUUUUGACCCGUUUccaguuuuuggguccgggcagucaaaaaaaaaauuggucaaaaaaaauuucgugcccauccuguc	231	F0RUNSI02G2PJZ_231_20_21	GAAGUUUUUUUUGACCCGUUU	20	5	0.87996
Candidate13	cgugccaccaccucugcugcauggagggagaugcgggccgacgccgggaagggcuauguaggccggccguuuggUCUCCAGCGAGCAGUGGCUGuuaugggcuuu	46	F0RUNSI02GZ1FA_46_75_20	UCUCCAGCGAGCAGUGGCUG	75	3	0.978723
Candidate14	auauagucuugagauucuuugagcugccagcggaaaagugcauucuguUGCUGGACAGCAAUCAGAGAGUaccaaaca	200	F0RUNSI02H9PGQ_200_49_22	UGCUGGACAGCAAUCAGAGAGU	49	3	1.35241
Candidate15	ucgagcuacuuggucccagcugucggccgcaccuugugcaauucucucguuuauauugacuacauaggUUGACAAUGGUGUGGGACCGugaugucaggaaccaggagaaa	358	F0RUNSI02HJKBH_358_69_20	UUGACAAUGGUGUGGGACCG	69	3	1.2743
Candidate16	cuuccccucaUGUCGAAAUUGACGAUCGUCUucgaagucaugggagcaucagagcaguagugcuuauagagaagaucugucaauugaacau	321	F0RUNSI02HO64C_321_11_21	UGUCGAAAUUGACGAUCGUCU	11	5	1.20066
Candidate17	cucggacgccuccaggauggggcucagcauuggcugcugcugcaucugguucUGCUGCGCCACCAUCUCUGCcugggcuuccg	60	F0RUNSI02HWI4M_60_53_20	UGCUGCGCCACCAUCUCUGC	53	3	0.801094
Candidate18	guaccugagacgguugaaacuguugcagcgugcuuggacaaaguauuuucauccagauauggagcaucgcUUCUGCCAAGCUAUGGUGUAuguguacccuaccgucuc	213	F0RUNSI02IW164_213_71_20	UUCUGCCAAGCUAUGGUGUA	71	3	1.03905
Candidate19	auaugacuUAGUAGUGUUACUAGAUGUUCUuugauggcaaugcaagauaucugugauguugcuggcaugguauguuguucuuucaguguagaacuuuaguauuauuacuggaugau	48	F1ADE5F01AJJIJ_48_9_22	UAGUAGUGUUACUAGAUGUUCU	9	5	0.818354
Candidate20	gacggcucaugcgggugcucaccgUAUCAGGCAUCUUUGCUGUCCaugaauccaccacggcagacaaggaggcuguuuaugugcuuaccccaaccacuugccuccuc	281	F1ADE5F01AKSPO_281_25_21	UAUCAGGCAUCUUUGCUGUCC	25	5	0.855059
Candidate21	ccauacuggaacucacaauagcuacccauuuaaugauuugaggaaacgauuguaaauccuacuuguaaucugcauaagauguUAGGUUAUUGUGUAAGUUCCAc	183	F1ADE5F01AVA9M_183_83_21	UAGGUUAUUGUGUAAGUUCCA	83	3	0.941112
Candidate22	gagaggagauuguagucgaugccgcacacggccacggucuucgucccgcgguagaggagguuguagcugaguUGGACCAUGUGCCGAGCGUCG	206	F1ADE5F01B2RYY_206_73_21	UGGACCAUGUGCCGAGCGUCG	73	3	0.844888
Candidate23	auggcgcucgcagcgacgccacgccagcggucggcgccggccguGCUGGUCGCGGCGGCGCUGCucucgcu	103	F1ADE5F01B5WW0_103_45_20	GCUGGUCGCGGCGGCGCUGC	45	3	1.50989
Candidate24	agcgggucaaaUUAACCGACGUCGUUGCUUACCuaaaguucuagcaacacgguaagagcgacuuggaauuuaacagc	170	F1ADE5F01B8SWY_170_12_22	UUAACCGACGUCGUUGCUUACC	12	5	1.3435
Candidate25	gguuauuuuaucaacuacuggguuguugaucgacauuacgguuuaauucuuacacgaauuaaUGUUGACUCGAUUCCCUAGUAGUagguug	294	F1ADE5F01BL1I9_294_63_23	UGUUGACUCGAUUCCCUAGUAGU	63	3	1.03613
Candidate26	agguggccgcGCAGCUGCCAUGCAAGGCCAacccagacgcgccggccaugguggaccguaugcugcggcugcuggccac	222	F1ADE5F01BM1O6_222_11_20	GCAGCUGCCAUGCAAGGCCA	11	5	1.00211
Candidate27	gacaacuuauuagcuaaaccaacccaaaagaaUUGUUGACCACCUCCAAGGCucagagccgcagccaggaggacggcaacagaggaggguuuguguu	157	F1ADE5F01BVGGD_157_33_20	UUGUUGACCACCUCCAAGGC	33	5	1.24023
Candidate28	ucuccauggaaccuacagacgguacauaacacauaacuugacuugauuauaacuugaauaacuaUGCCCAAGUUGAGUAAUGUAUUaguaaauacuuucuccuaaccauaga	347	F1ADE5F01BXRML_347_65_22	UGCCCAAGUUGAGUAAUGUAUU	65	3	1.04535
Candidate29	acuguuacagguucaucgaugaggaucaguugguggugaaucugaagaaagucgagcaagagcugaaaUGGCCCGACAUUGAUGAAUCCUg	162	F1ADE5F01CKEXA_162_69_22	UGGCCCGACAUUGAUGAAUCCU	69	3	0.929084
Candidate30	ucgauucgcugguccggccauaggaugaccuucaacgacggcugguuugucuccauguacgccuucucGGUCUCCUAGGCUGGCAACGgcgau	339	F1ADE5F01DG2WX_339_69_20	GGUCUCCUAGGCUGGCAACG	69	3	0.828887
Candidate31	acccagacgucuccguggUGGUCCUAGACUGGUCUUCGgccgagccaacacgaggucggaguccccgaggacccaguuagucaugacgcccgaugucacgaa	148	F1ADE5F01DGFG9_148_19_20	UGGUCCUAGACUGGUCUUCG	19	5	0.800376
Candidate32	gcgcggacguggucgugugggccgguucccguccauugccacacgaggcgugcGGGCGGGUUUCCGUCCAUACCACAcguguagc	20	F1ADE5F01DJS6J_20_54_24	GGGCGGGUUUCCGUCCAUACCACA	54	3	0.899749
Candidate33	uugaagcuccagcUCCAUGCACGCAUGCAGCUUaauuguaggccagguagcuggaugcauggauggacggaucgagcauucag	230	F1ADE5F01DVEIS_230_14_20	UCCAUGCACGCAUGCAGCUU	14	5	0.876272
Candidate34	aagacccuggggcucgcuugcuggugacuuucuggaugguggagacgacgaggcuuuguggucaagacccagcugguuuGUUACCAGGAGCGAGUCCCUGaagucgcugaug	155	F1ADE5F01DW1U5_155_80_21	GUUACCAGGAGCGAGUCCCUG	80	3	1.42162
Candidate35	aaguaggaGCUCAUGUCUCCUCCAAUGGaugucucgugcaucuggaguacaaggagaacagcacgugcccguuggagguggcucgagcgaugc	196	F1ADE5F01E2FII_196_9_20	GCUCAUGUCUCCUCCAAUGG	9	5	0.93035
Candidate36	gcagcGCUGGUGGCGCGGGCUCGACCuucuccuggaccucguagucccgcggaggagacgacggcggggucgggcauggccccagcggugcauc	161	F1ADE5F01ET1L0_161_6_21	GCUGGUGGCGCGGGCUCGACC	6	5	1.436
Candidate37	aaggcguuccucgacauggccggcgugagggaccgcuccaaggucgccgugguggacgaccccgaggcccgcgCGCGGCGGCUGCUCGAGGAGCuccgccu	216	F1NBZEY01AVKW2_216_74_21	CGCGGCGGCUGCUCGAGGAGC	74	3	0.981395
Candidate38	acggagccggcgccgcgcgugUCUCGUCCAGGCGGGUGGCGccgccccagccgccgcccaugucgaggaggcgcggagcgacgguggccgugacgcugccg	22	F1NBZEY01AYSMM_22_22_20	UCUCGUCCAGGCGGGUGGCG	22	5	0.802926
Candidate39	cgcaaggcuggcggcagguacgcggcaaacggugccagggacagccacggcaauggcaugcccgaccucaUGCGCCAGUUUGCCGGUAUCauucgccaggugau	78	F1NBZEY01B9RJV_78_71_20	UGCGCCAGUUUGCCGGUAUC	71	3	1.64123
Candidate40	ugccacGGUCGAGCUGGAGCGAGUGGaaccuggacgacggggcucgccacacgccaucggccggccucgggaaaggc	164	F1NBZEY01BD0PY_164_7_20	GGUCGAGCUGGAGCGAGUGG	7	5	0.869128
Candidate41	aucgccgugcUCUGCCUCGUGGCCGUCCUGGUcgcgcccgcgcucgccgugccgggaggcggcggcgacgacggcugcgaggccgagucggc	29	F1NBZEY01BDYOI_29_11_22	UCUGCCUCGUGGCCGUCCUGGU	11	5	1.05152
Candidate42	agcaaUUGCAAUUGAUAUUGGAUCGGcauccgcagagaauugcgcuccucuccgauccacccaauugcaaucgc	114	F1NBZEY01D2PS6_114_6_21	UUGCAAUUGAUAUUGGAUCGG	6	5	0.804163
Candidate43	guaucuggaGAUUGGUAUAGUUGCUGGUGuuccuacuucuaucaacgguaaagaucucucgccagcaacucuccucgcca	220	F1NBZEY01EQTK0_220_10_20	GAUUGGUAUAGUUGCUGGUG	10	5	0.941613
Candidate44	cuguguauuUGAAUUAUUGUCAGCACAUAUuacaaaaaauuguucaauguguguuugaaaauuauucauuguacauuaca	6	F1NBZEY02HLGX9_6_10_21	UGAAUUAUUGUCAGCACAUAU	10	5	1.44182
Candidate45	uacaggaacuGCUCUACACCGGCAUCAUCAcgguacaggaccaaacaaaauuugaugagcgguguggacgucc	132	F1NBZEY02I30V9_132_11_20	GCUCUACACCGGCAUCAUCA	11	5	1.23319
Candidate46	aaauuguucucaagacagaguaggcaaaacaugacggcuuguacuugaaaaaggaauacaagugcugcaacUAUGUUGUUGCCUGCUGCUAugacagacggacga	154	F1NBZEY02I8MMU_154_72_20	UAUGUUGUUGCCUGCUGCUA	72	3	1.19127
Candidate47	uggaagucaggugaacuugauauugaacaaaacaauuaagaguuggaacUUGUAACAACAUCAAGUUACACcuucacuuucu	218	F1NBZEY02IE57O_218_50_22	UUGUAACAACAUCAAGUUACAC	50	3	1.89221
Candidate48	uugggugguUUGAUGCUGGAACCAGUUAAuaaggauuucuggguuacauuggguucagucucaaguaauc	84	F1NBZEY02IQZTE_84_10_20	UUGAUGCUGGAACCAGUUAA	10	5	0.85997
Candidate49	agggcuauauuuauagggaaaagagaggggauuucguccacccuaggcaaggugggacuaaaacaccuccuaagcccgUUUCCUCUAUAAUAUGGACUC	235	F1NBZEY02IYIK6_235_79_21	UUUCCUCUAUAAUAUGGACUC	79	3	0.889158
Candidate50	ugaaauggaucuguagcgggaguucgcaGUUUAUCAUGGAUUCCGUUUUauuuggaccuagaaaaaggaagucaaagauagcuguuuuauacucccucuguuuca	35	F1NBZEY02JD0JU_35_29_21	GUUUAUCAUGGAUUCCGUUUU	29	5	0.967896
Candidate51	uacaaaucagccUAGCAACUUCGGGCCACCAGccaccggaagacuugaaugaguaaccgaaccugaucugguguuccaaguucuaacugcua	404	F1NBZEY02JVU2Y_404_13_20	UAGCAACUUCGGGCCACCAG	13	5	1.18573
Candidate52	ccugggacaauaaggaguauuuccuagucgaucguuugaguucauucgagaagcaCUGCACAAUCUCCUUGUUGUacauuugau	251	F2MIQBM01B8E9I_251_56_20	CUGCACAAUCUCCUUGUUGU	56	3	1.14658
Candidate53	auggcuguggugcgacacauuuaagcagguaaauagcccagggccacaugggguguuaaaugUGGUUAAAUUGGUCGUCAACCaagccc	338	F2MIQBM01BH1GK_338_63_21	UGGUUAAAUUGGUCGUCAACC	63	3	0.967152
Candidate54	cauuagagaaugcauaauaucuaugcuguguuagucacauguauacgaucaaauggaugauuuuggcuuucuuacaaugucggaugcaaGCAUGAUGUUAUACAUUUUUcg	79	F2MIQBM01BH2UQ_79_90_20	GCAUGAUGUUAUACAUUUUU	90	3	0.840876
Candidate55	gggguCUUGUGCGAGGACUAGCGUUUgcuuuagucaaaccaaaauacuucuaaaauugcagcugcacuuguugguccgauguacaugagaagccccaguuu	210	F2MIQBM02D36JJ_210_6_21	CUUGUGCGAGGACUAGCGUUU	6	5	0.846169
Candidate56	auuugggaacugcgugugguaaauacuuccgagucugcugccugaguaucaucgacccugguaUCUACCACCGCAUCUCUCAA	108	F2MIQBM02DDKBF_108_64_20	UCUACCACCGCAUCUCUCAA	64	3	0.808029
Candidate57	ggucgaauuagccggaucguccgggccgggguccggaucguccgggcucuguccggaucguccGGGCCGCCGUCCGGAUCGUCCGGcca	29	F2MIQBM02DF9M6_29_64_23	GGGCCGCCGUCCGGAUCGUCCGG	64	3	0.911227
Candidate58	ucucuccggUCGGUCGGACUCGCACCGAGccgccggucgaaccagcuccgccacuuggugcgaccgaccgaucgc	341	F2MIQBM02DTNSL_341_10_20	UCGGUCGGACUCGCACCGAG	10	5	1.091
Candidate59	cuuccuuguugcagccauggcaaaguauguccagagugcuccuguuagcaaugaagcauugcagcacaaggaguuucucuUGGACAACUUGUACAUGGAGCaac	93	F2MIQBM02EWFIP_93_81_21	UGGACAACUUGUACAUGGAGC	81	3	0.818125
